# Supplementary material
Source: PubMed Central journal article supplement (PMC1693751)

# SISTM

♂ ♀ ♂ ♀ ♂ ♀ ♂ ♀ ♂ ♀

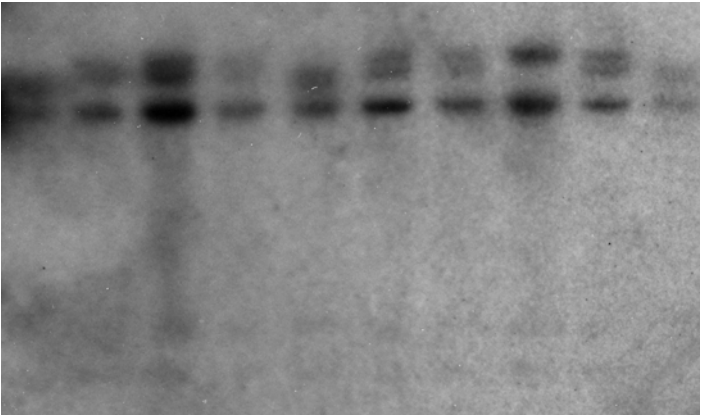

# SICUC

♂ ♀ ♂ ♀ ♂ ♀ ♂ ♀ ♂ ♀

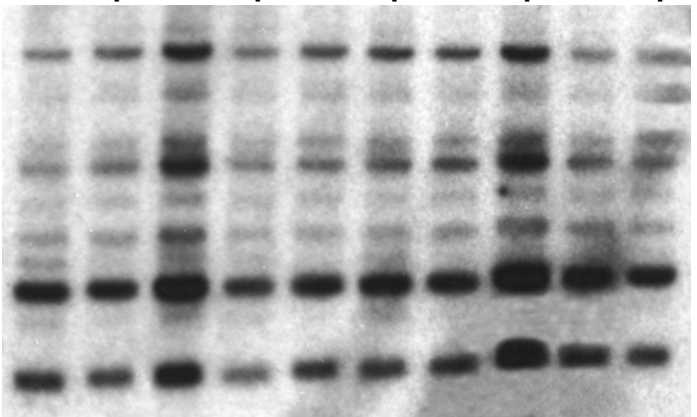

Supplement: pnas_0606622103_1.pdf [file pnas_0606622103_1.pdf]
